# Supplementary material for: Adipose-Derived Stem Cells Facilitate Ovarian Tumor Growth and Metastasis by Promoting Epithelial to Mesenchymal Transition Through Activating the TGF-β Pathway
Source: PubMed Central journal article supplement (PMC8727693; doi:10.3389/fonc.2021.756011), 2021-12-22

Figure 1

**C Colone formation (OV3)**

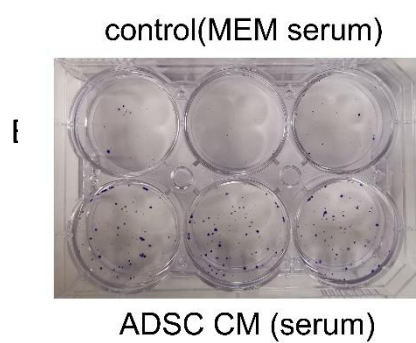

**D Colone formation (OV8)**

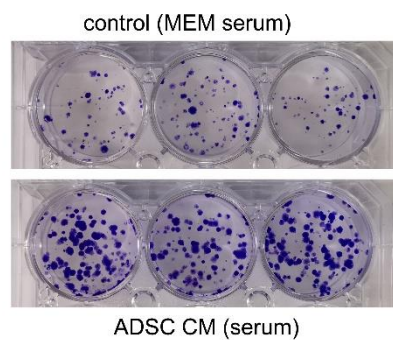

**E Migration (OV3)**

CON

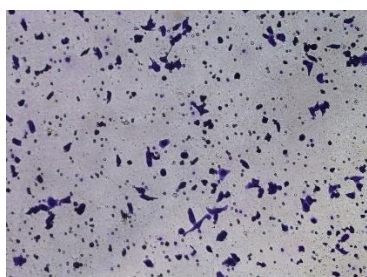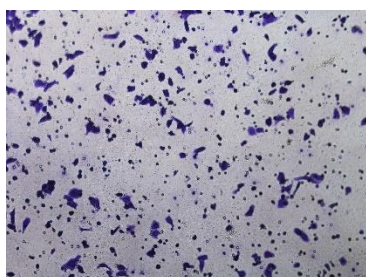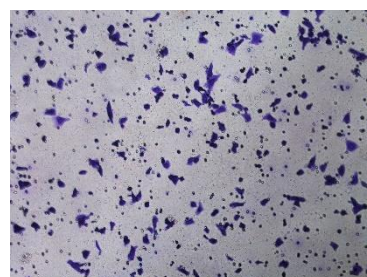

ADSC CM

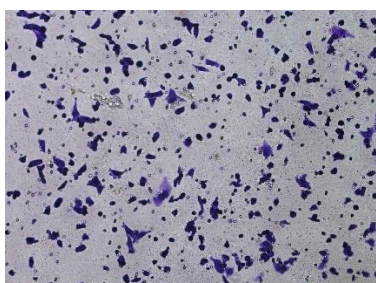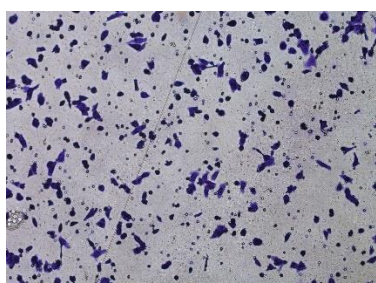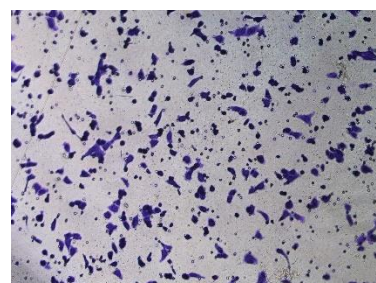

**F Migration (OV8)**

CON

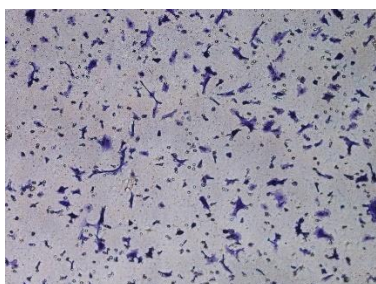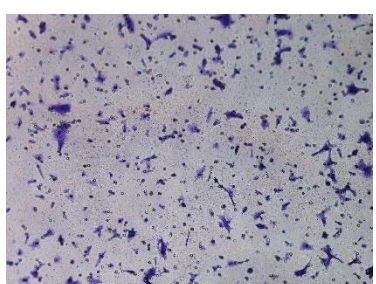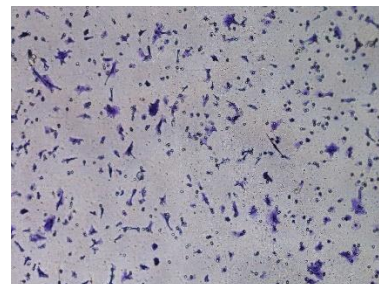

ADSC CM

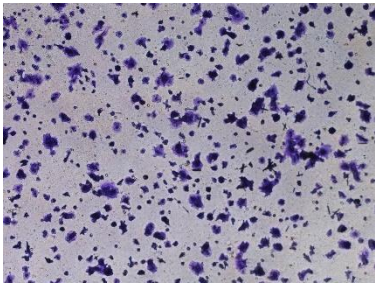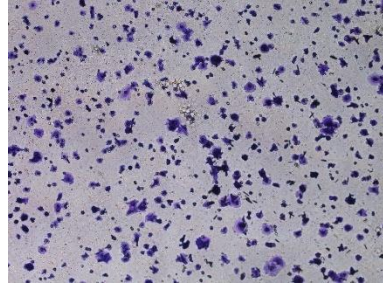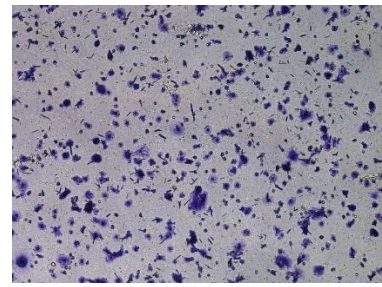

**G Invasion (OV3)**

CON

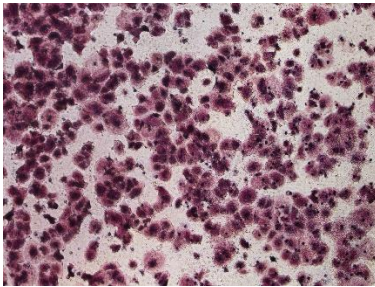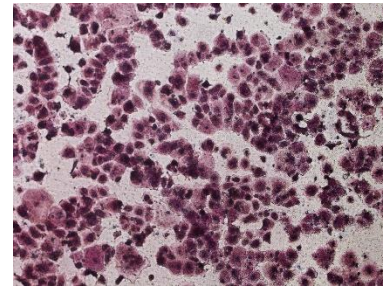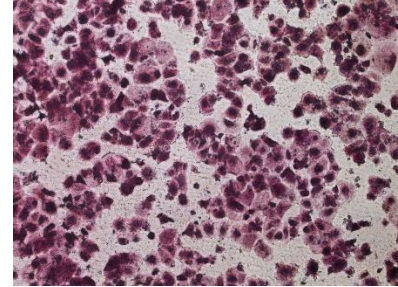

ADSC CM

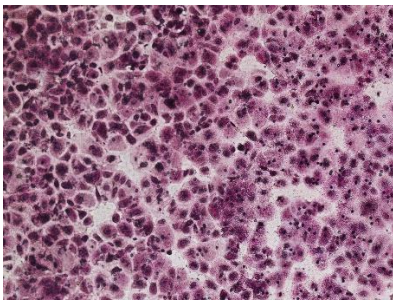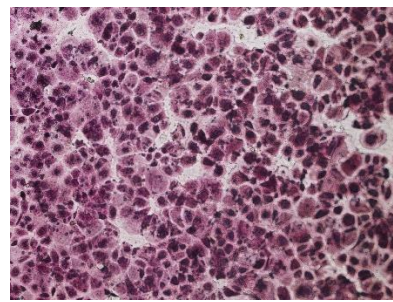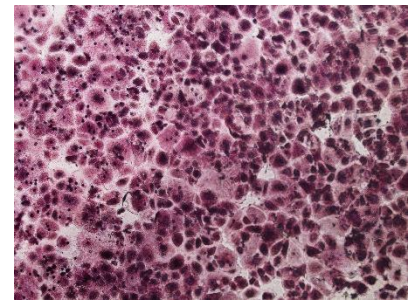

**H Invasion (OV8)**

CON

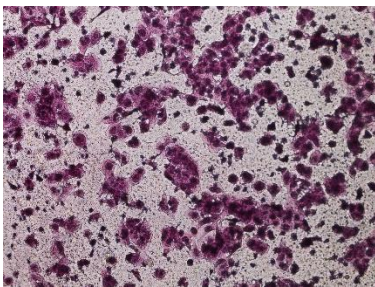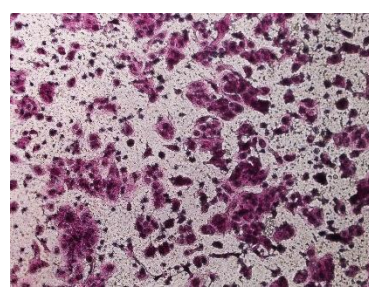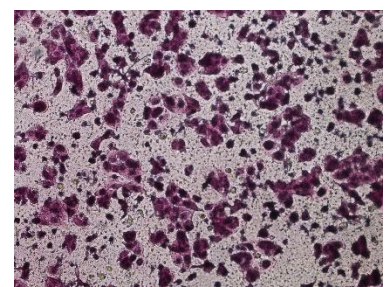

ADSC CM

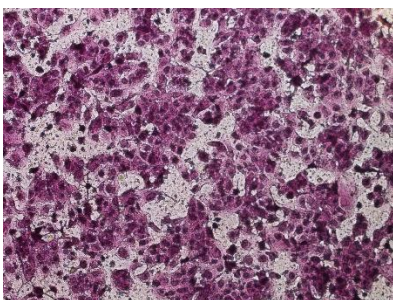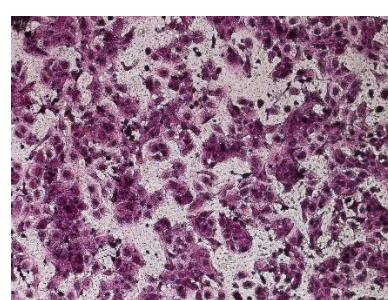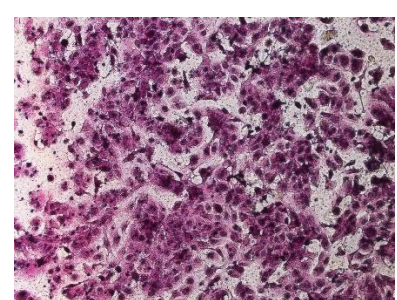

**Figure 2**

**A EMT (OV3)**

E-cad

0h      24h      48h

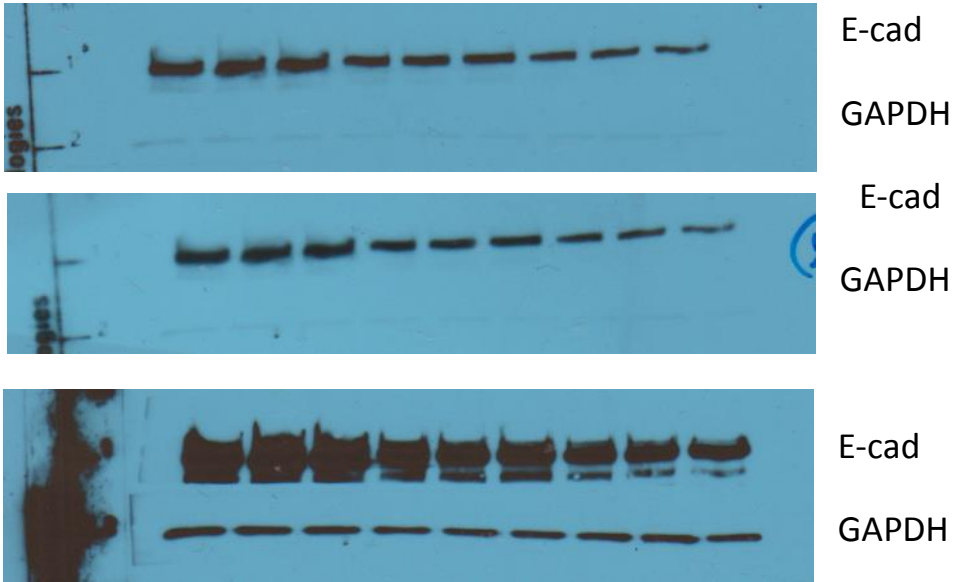

N-cad

0h      24h      48h

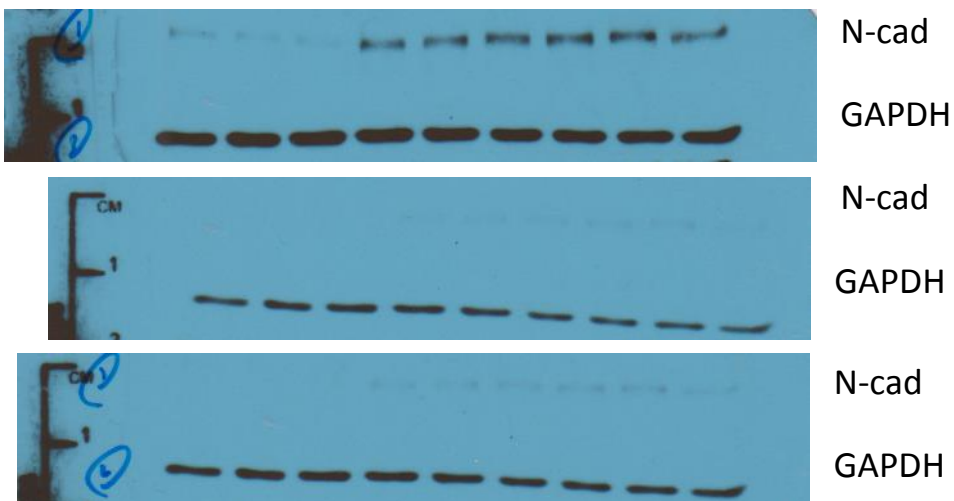

Cyt7

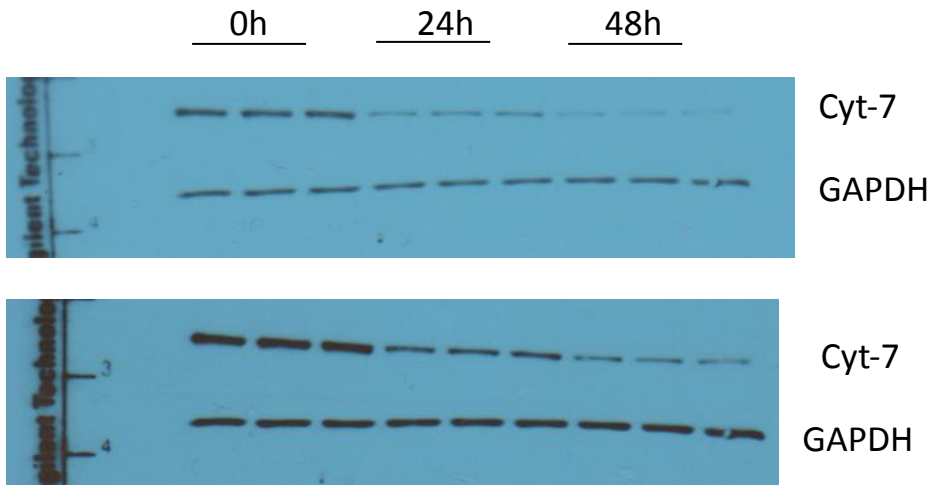

Vimentin

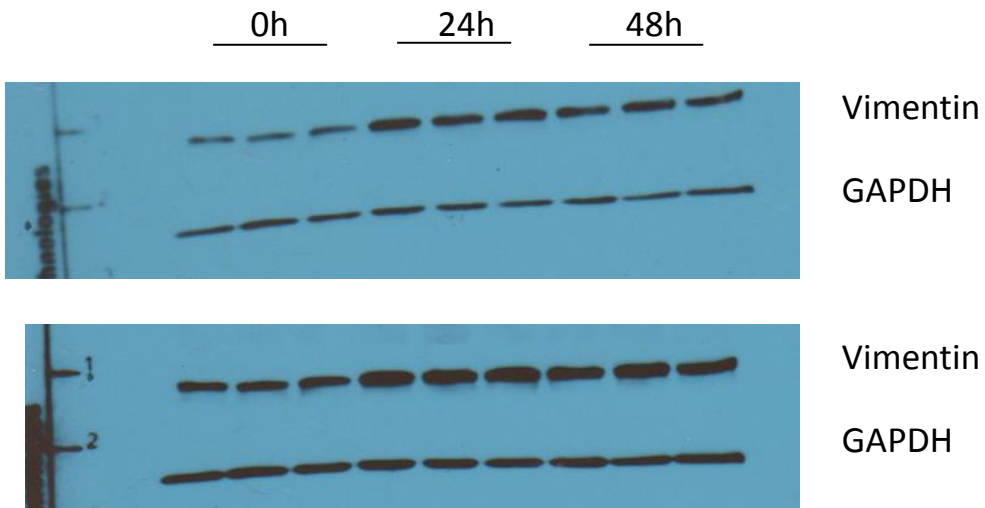

**B EMT (OV8)**

E-cad

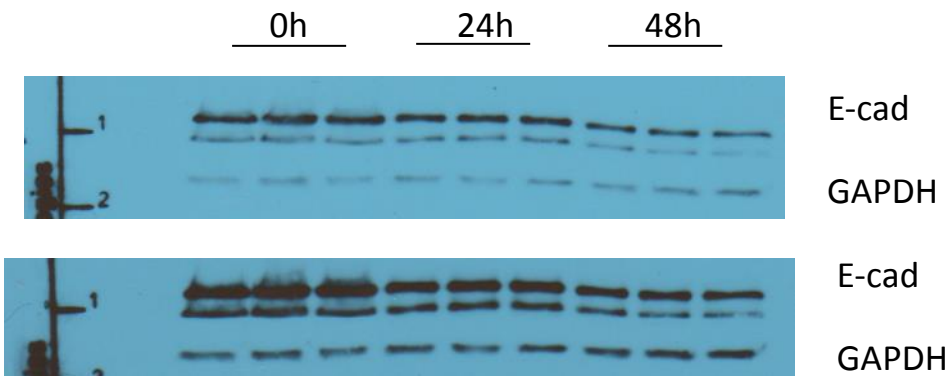

N-cad

0h      24h      48h

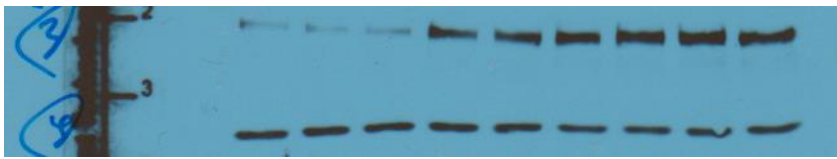

N-cad

GAPDH

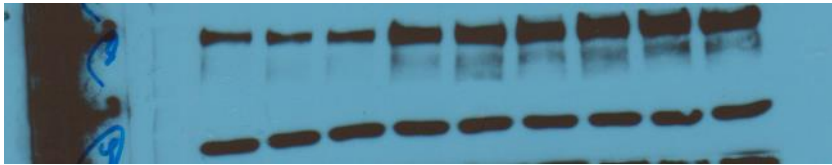

N-cad

GAPDH

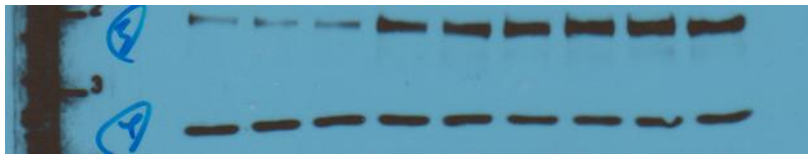

N-cad

GAPDH

Cyt7

0h      24h      48h

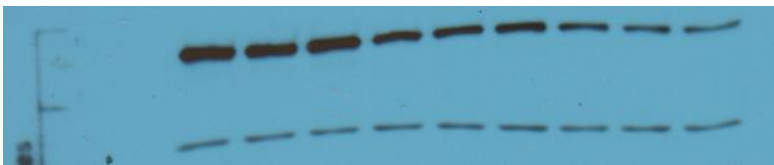

Cyt-7

GAPDH

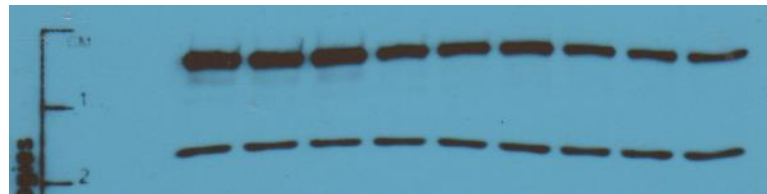

Cyt-7

GAPDH

Vimentin

0h      24h      48h

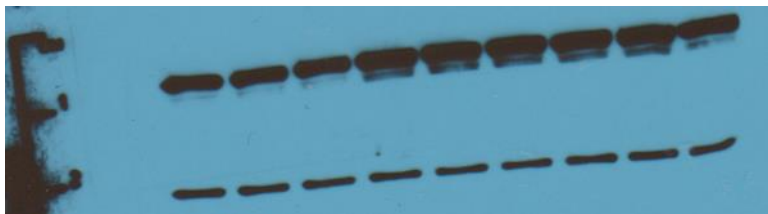

Vimentin

GAPDH

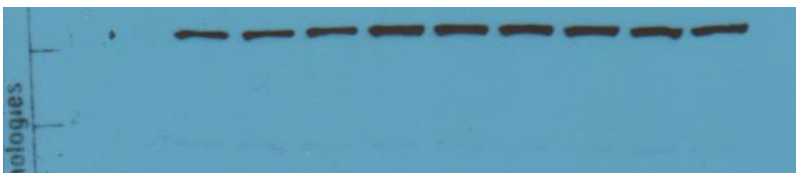

Vimentin

GAPDH

# C p-SMAD2 (OV3)

0h      24h      48h

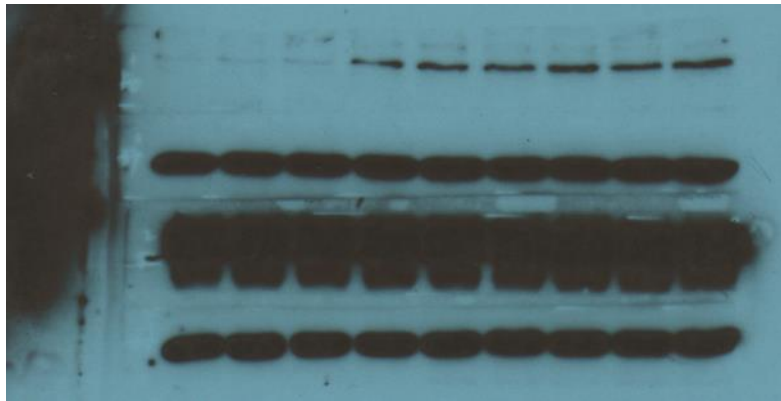

p-SMAD2

GAPDH

SMAD2/3

GAPDH

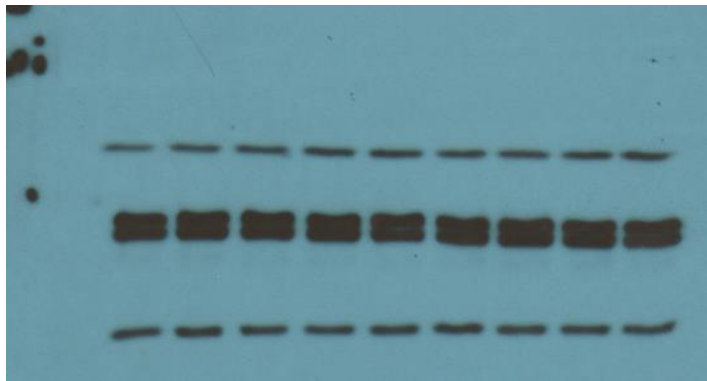

p-SMAD2

GAPDH

SMAD2/3

GAPDH

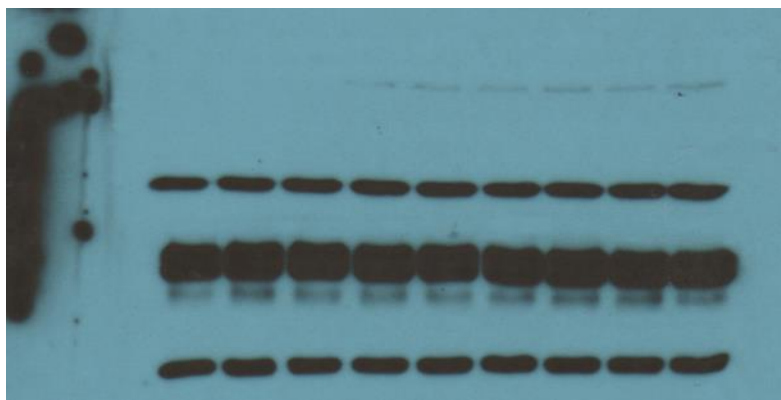

p-SMAD2

GAPDH

SMAD2/3

GAPDH

## D p-SMAD2 (OV8)

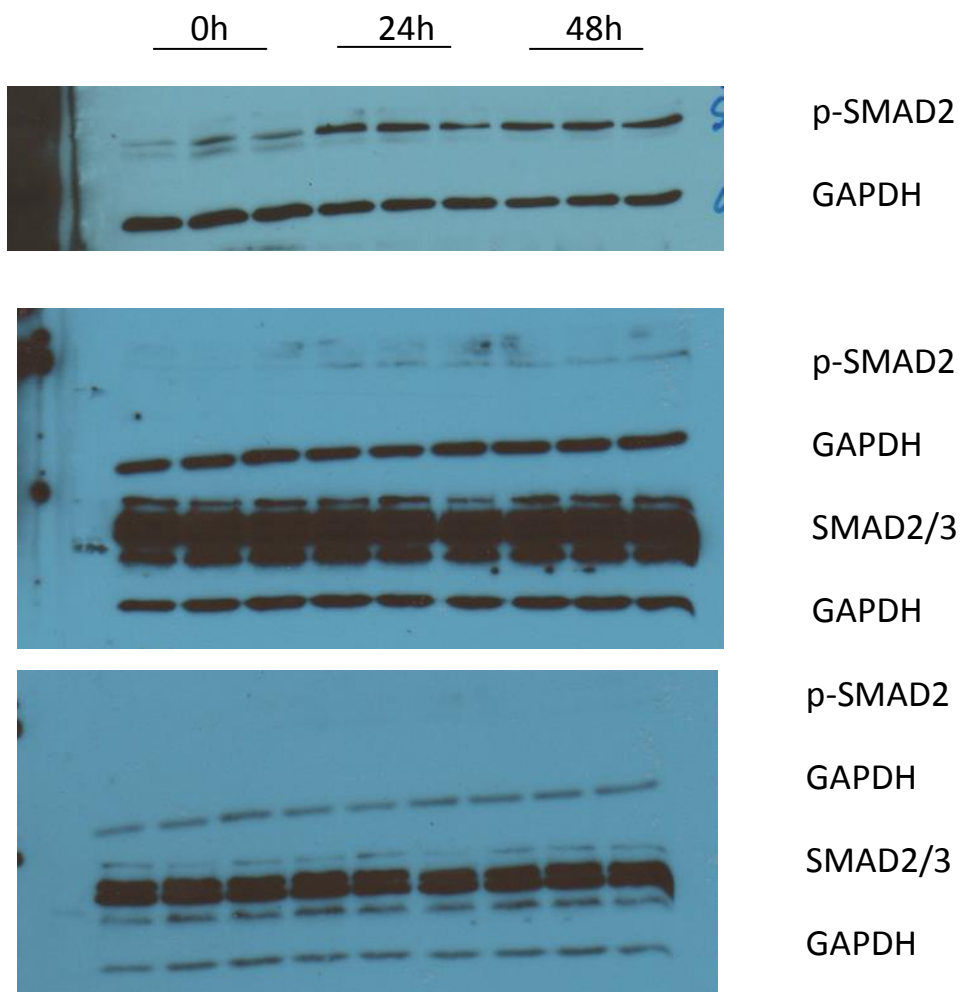

**Figure 3**

**A OV3 p-SMAD2(CM+SB)**

|  |                |     |     |                   |     |     |
|--|----------------|-----|-----|-------------------|-----|-----|
|  | <u>ADSC CM</u> |     |     | <u>ADSC CM+SB</u> |     |     |
|  | 0h             | 24h | 48h | 0h                | 24h | 48h |

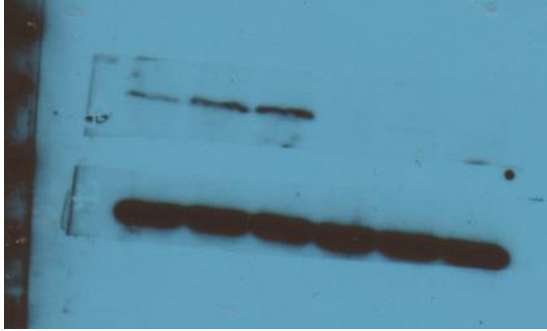

p-SMAD2

GAPDH

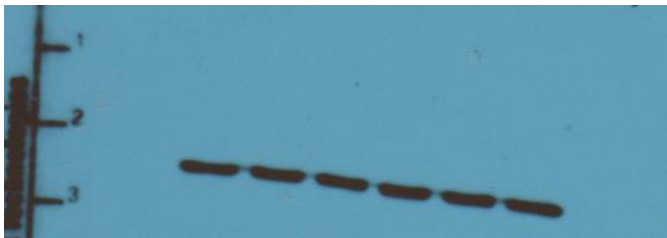

p-SMAD2

GAPDH

**B OV8 p-SMAD2(CM+SB)**

|  |                |     |     |                   |     |     |
|--|----------------|-----|-----|-------------------|-----|-----|
|  | <u>ADSC CM</u> |     |     | <u>ADSC CM+SB</u> |     |     |
|  | 0h             | 24h | 48h | 0h                | 24h | 48h |

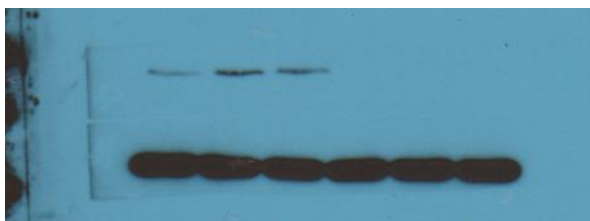

p-SMAD2

GAPDH

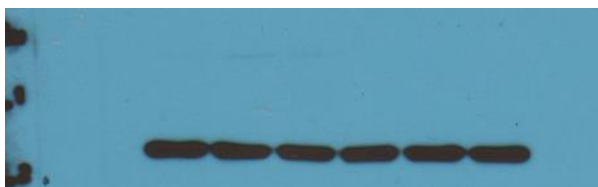

p-SMAD2

GAPDH



### E OV3 EMT (CM+SB)

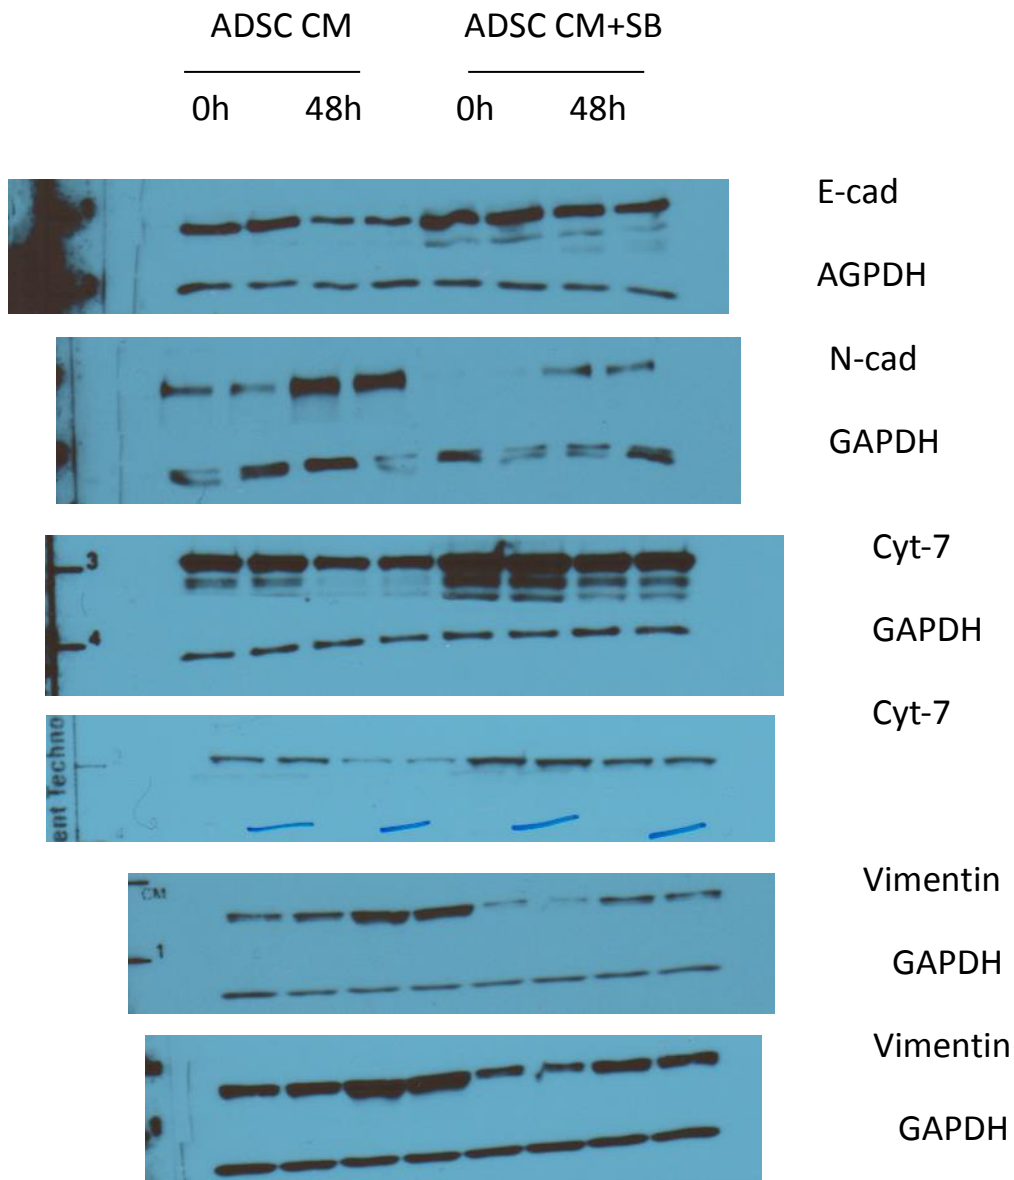

### F OV3 EMT (CM+SB)

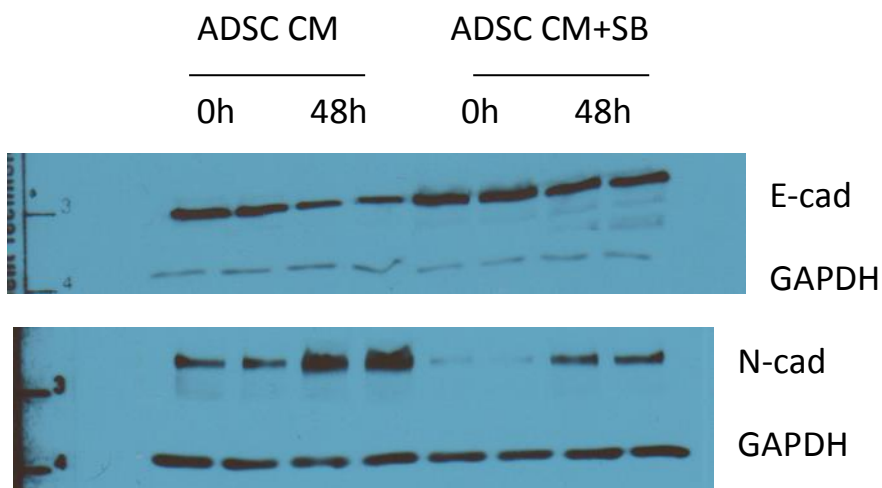

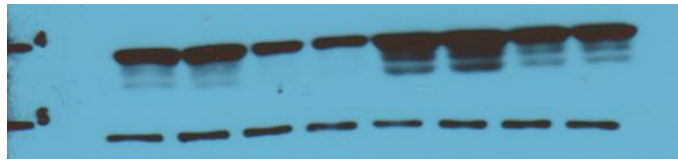

Cyt-7

GAPDH

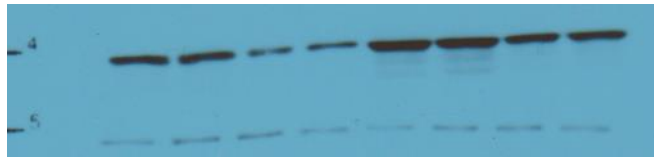

Cyt-7

GAPDH

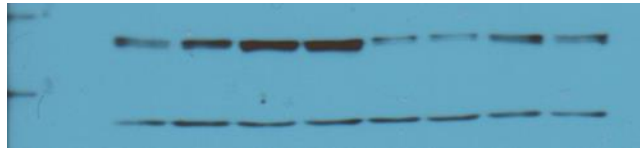

Vimentin

GAPDH

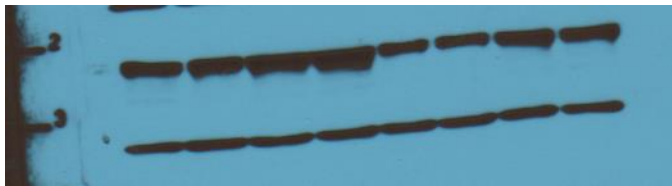

Vimentin

GAPDH

### I Colone formation (OV3) (CM+SB)

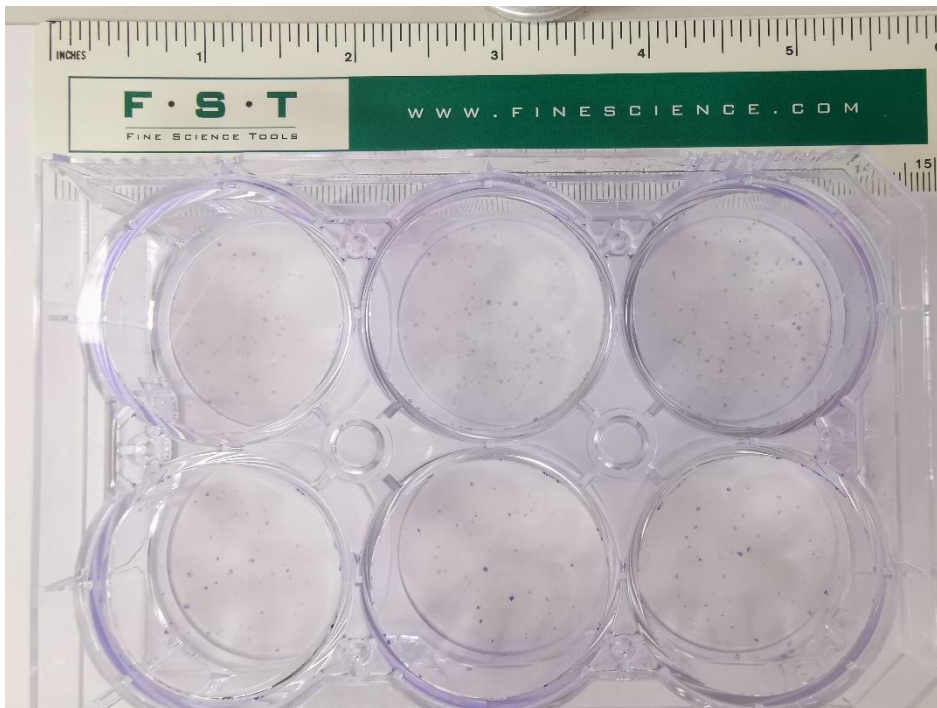

ADSC CM

Con

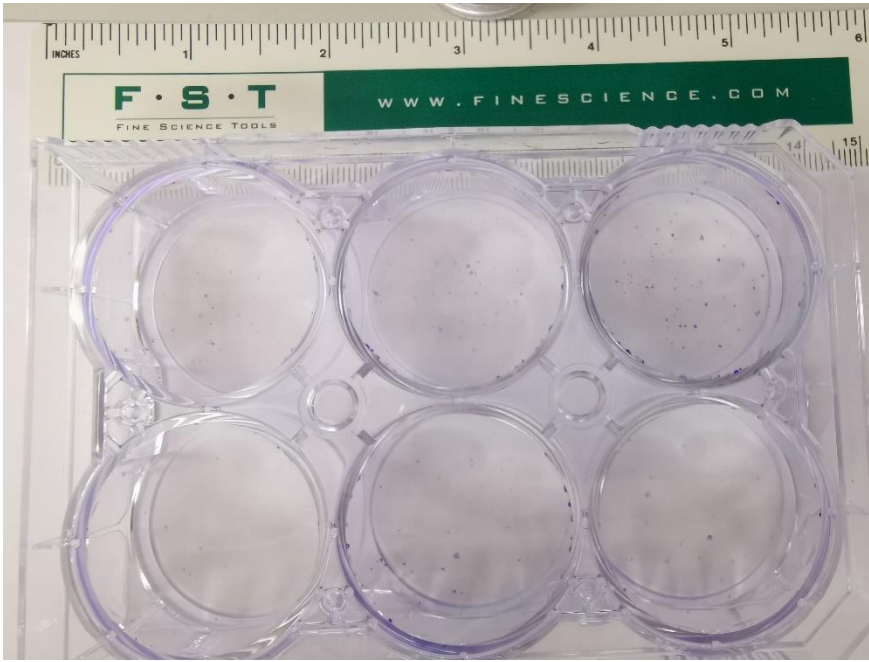

ADSC CM+SB

Con+SB

**J Colone formation (OV8) (CM+SB)**

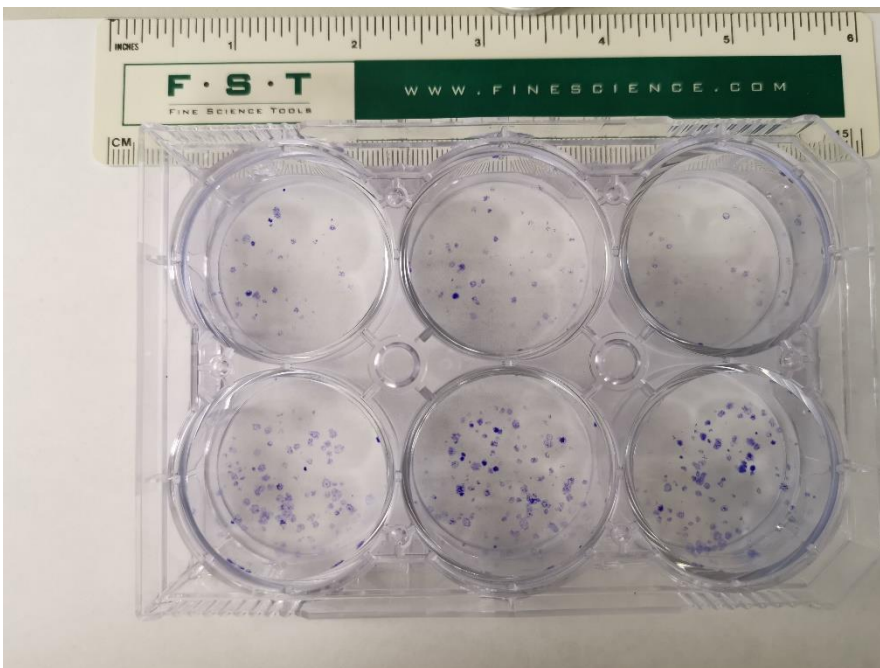

Con+SB

Con

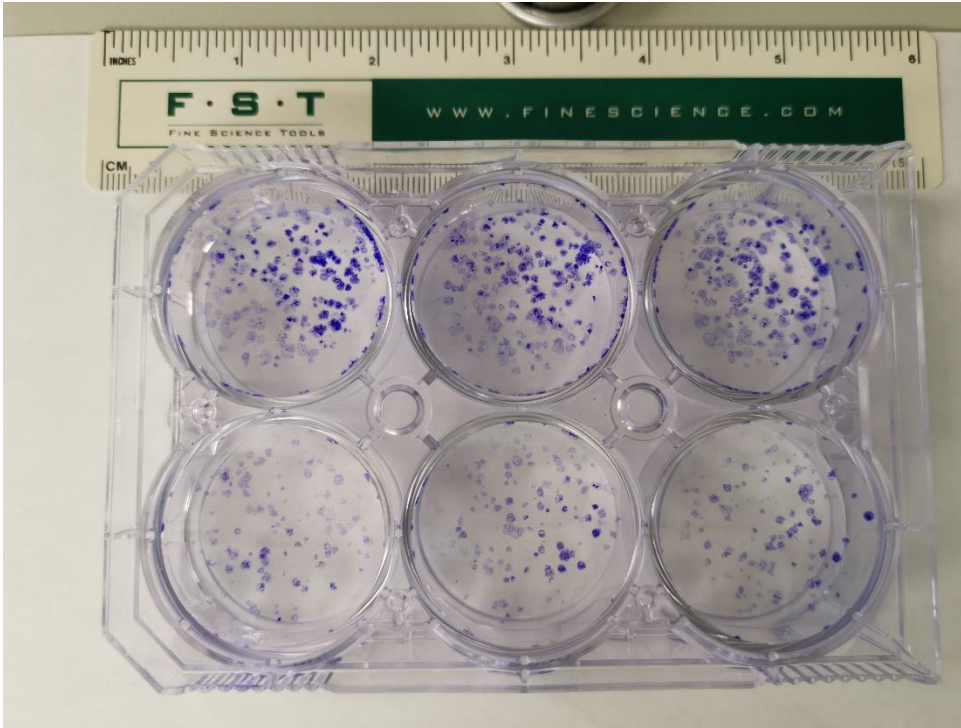

ADSC CM

CM+SB

### K Migration (OV3)(CM+SB)

Con

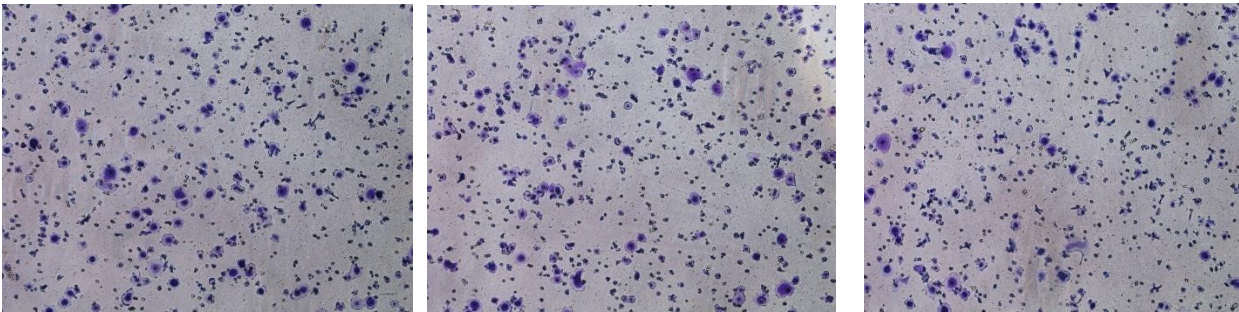

ADSC CM

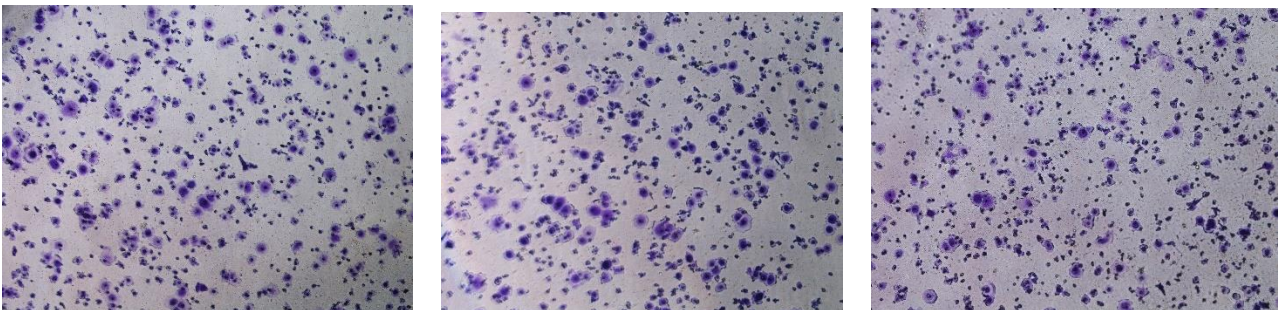

Con+SB

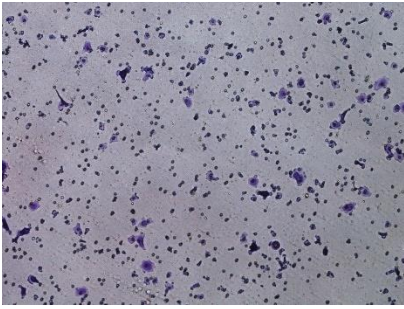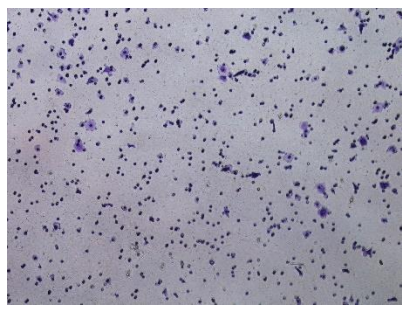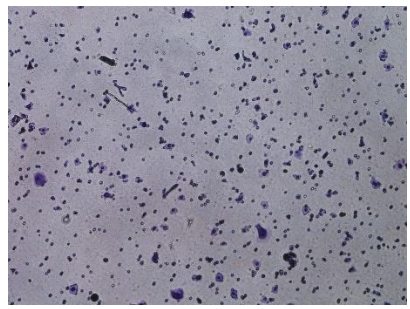

ADSC +CM

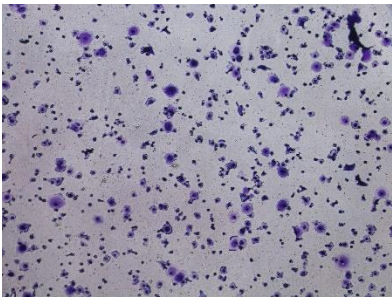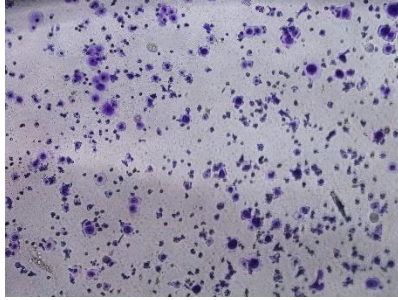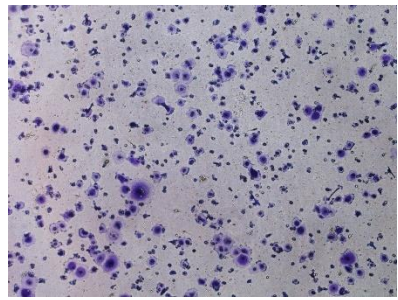

L Migration (OV8)(CM+SB)

Con

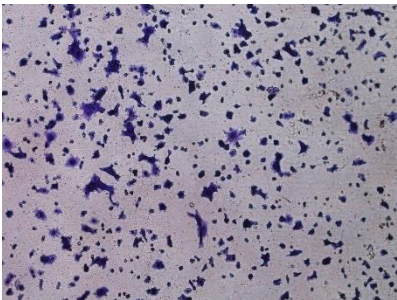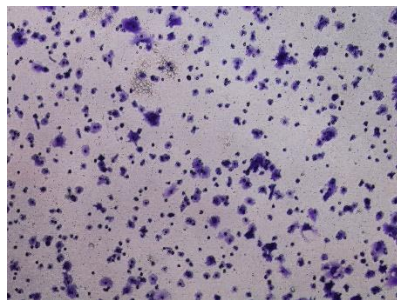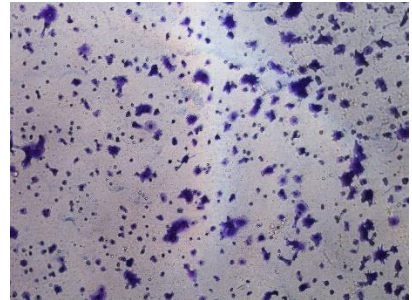

ADSC CM

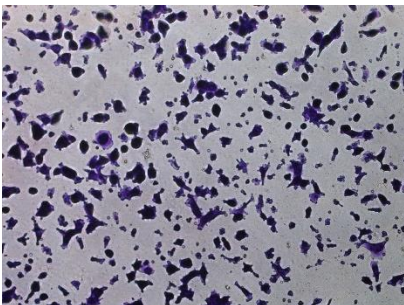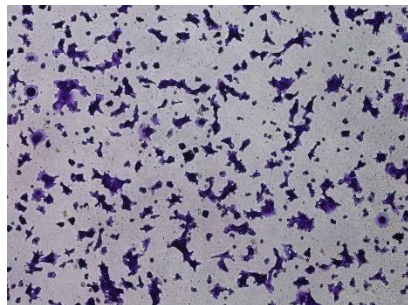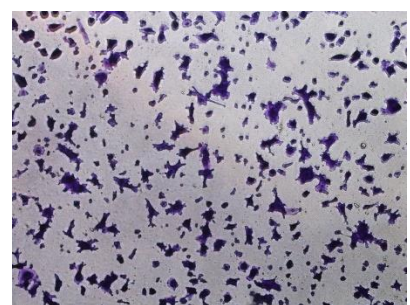

Con+SB

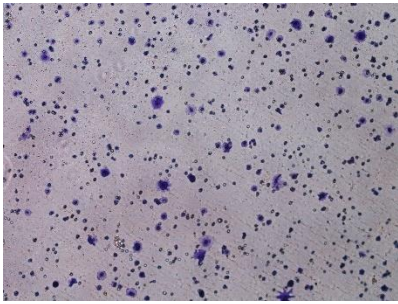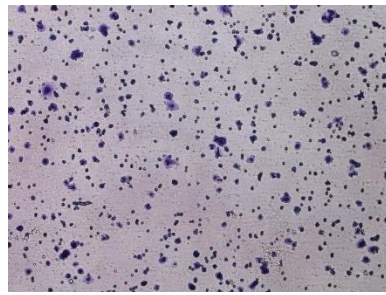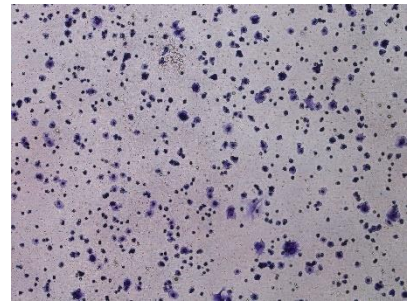

ADSC CM+SB

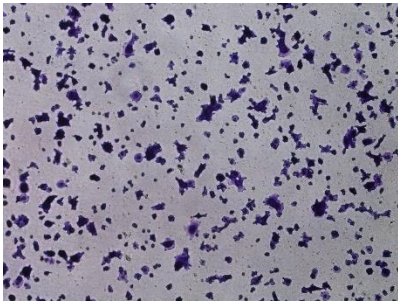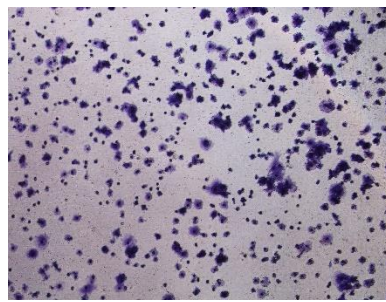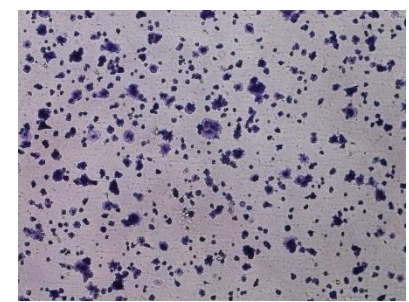

M Invasion (OV3)(CM+SB)  
Con

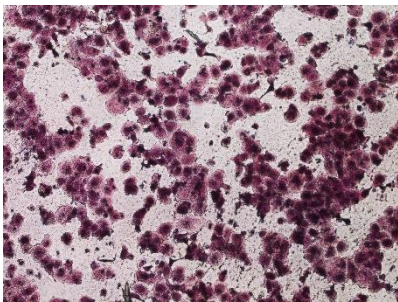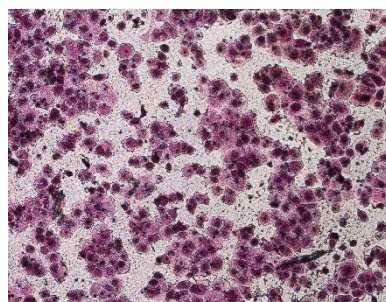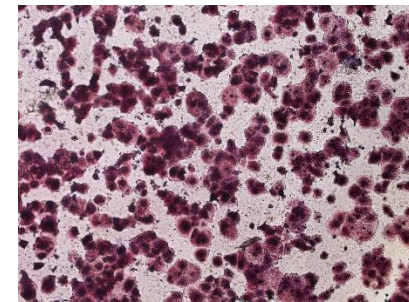

ADSC CM

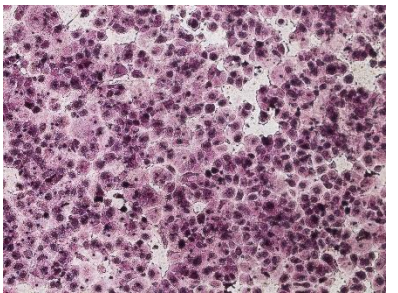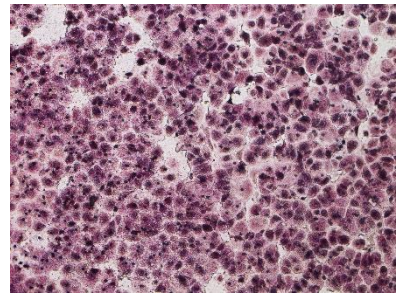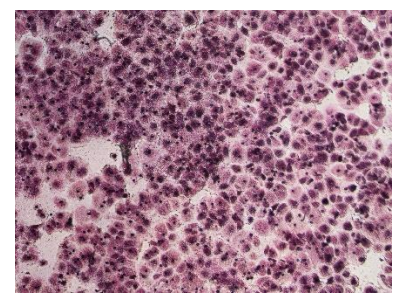

ADSC CM+SB

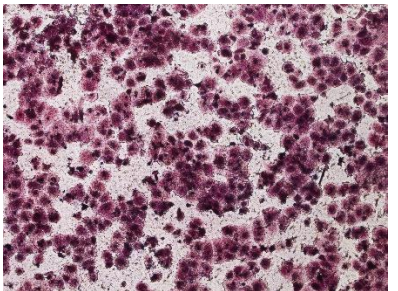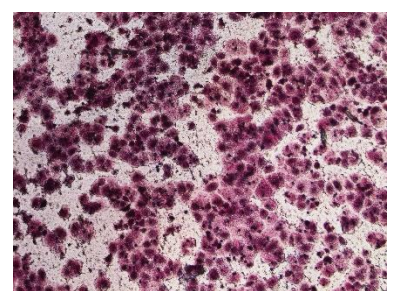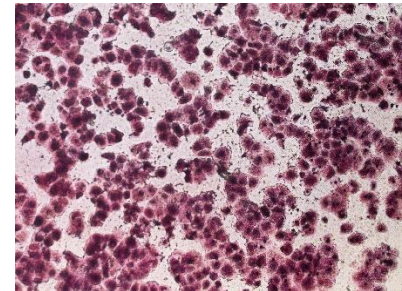

Con+SB

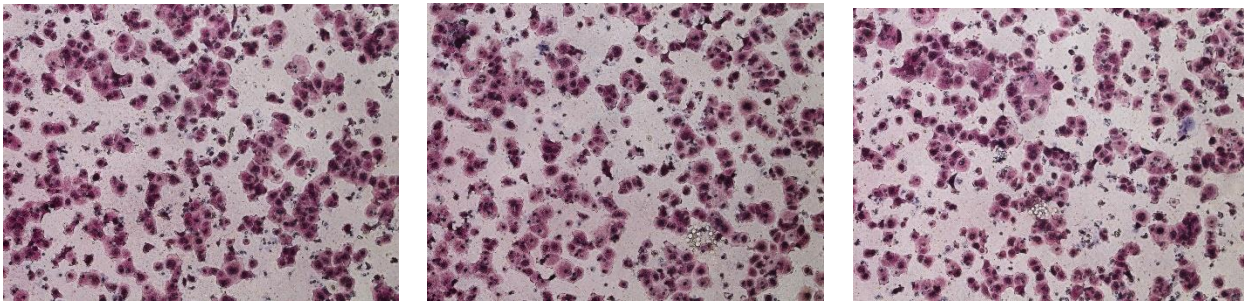

N Invasion (OV8)(CM+SB)

Con

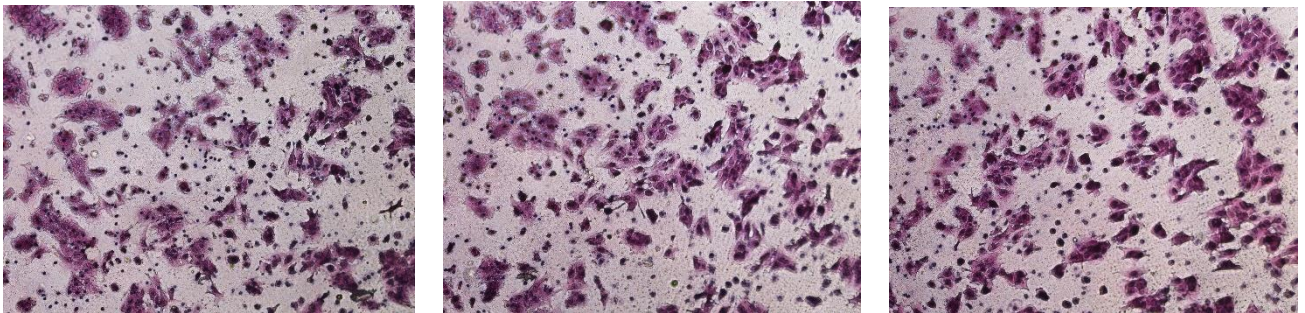

ADSC CM

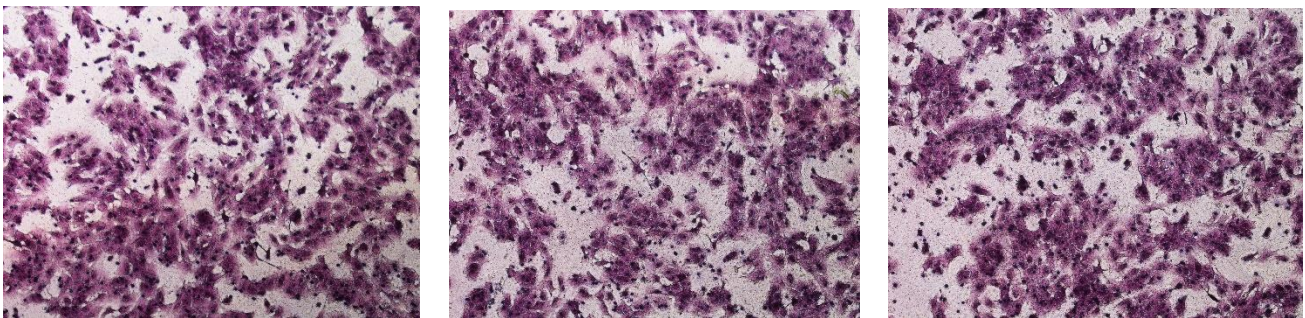

Con+SB

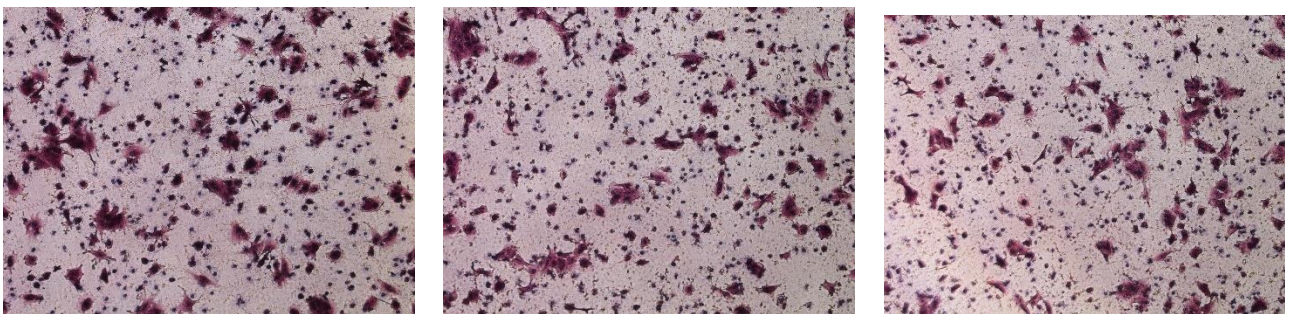

ADSC CM+SB

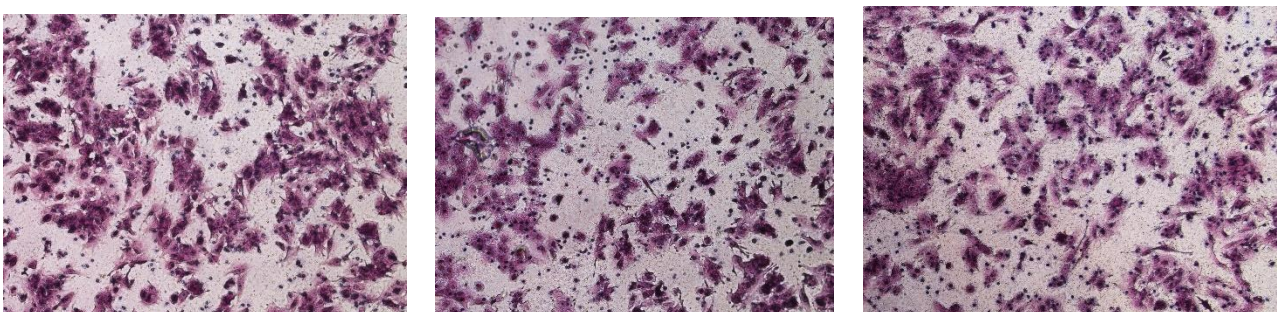

Figure 4  
A Live animal imaging  
Con

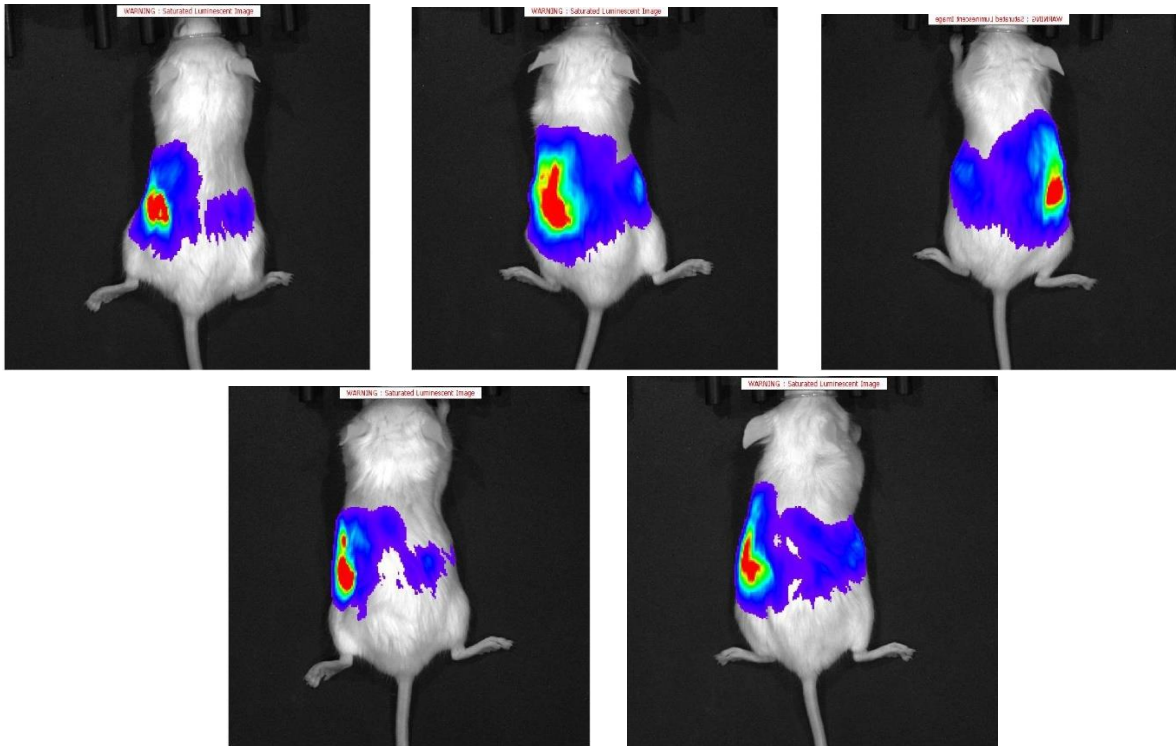

ADSC CM

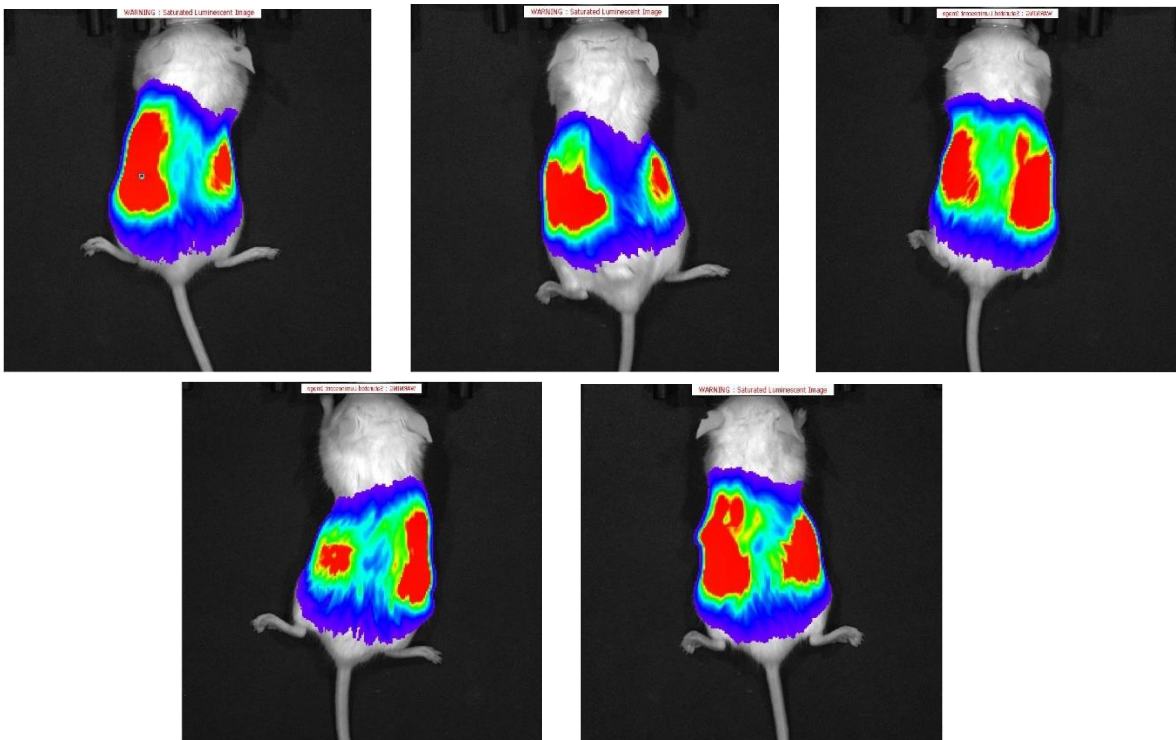



SB

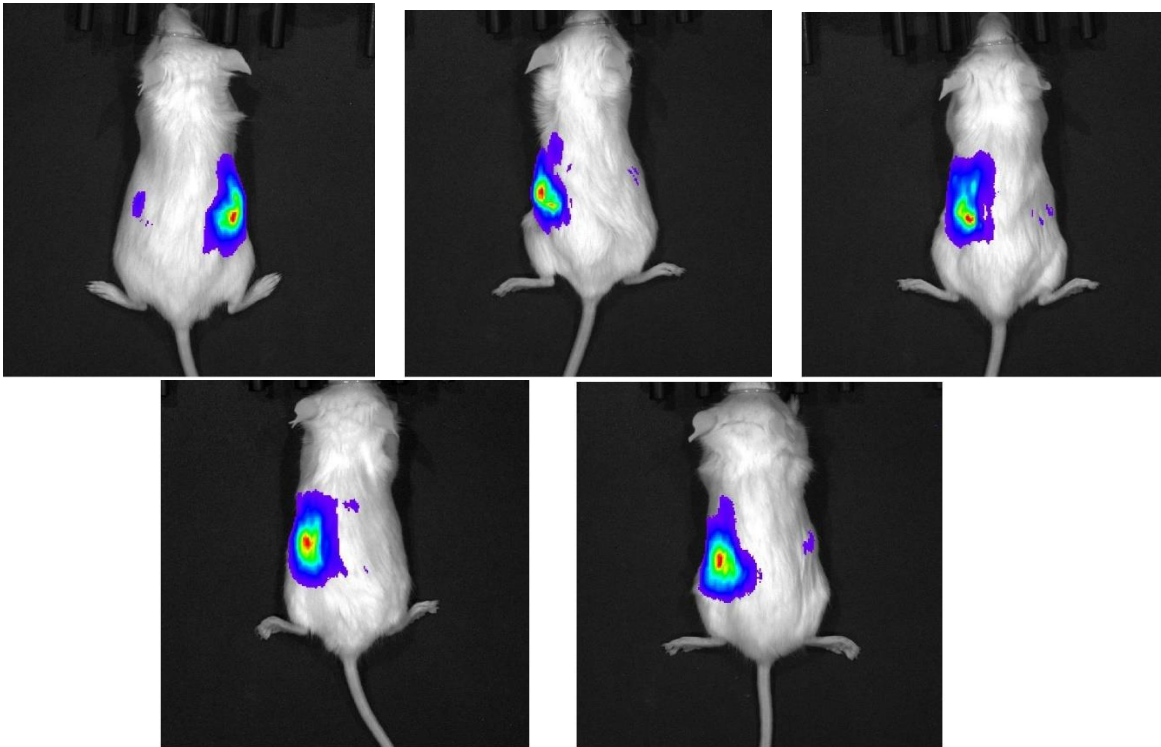

CM+SB

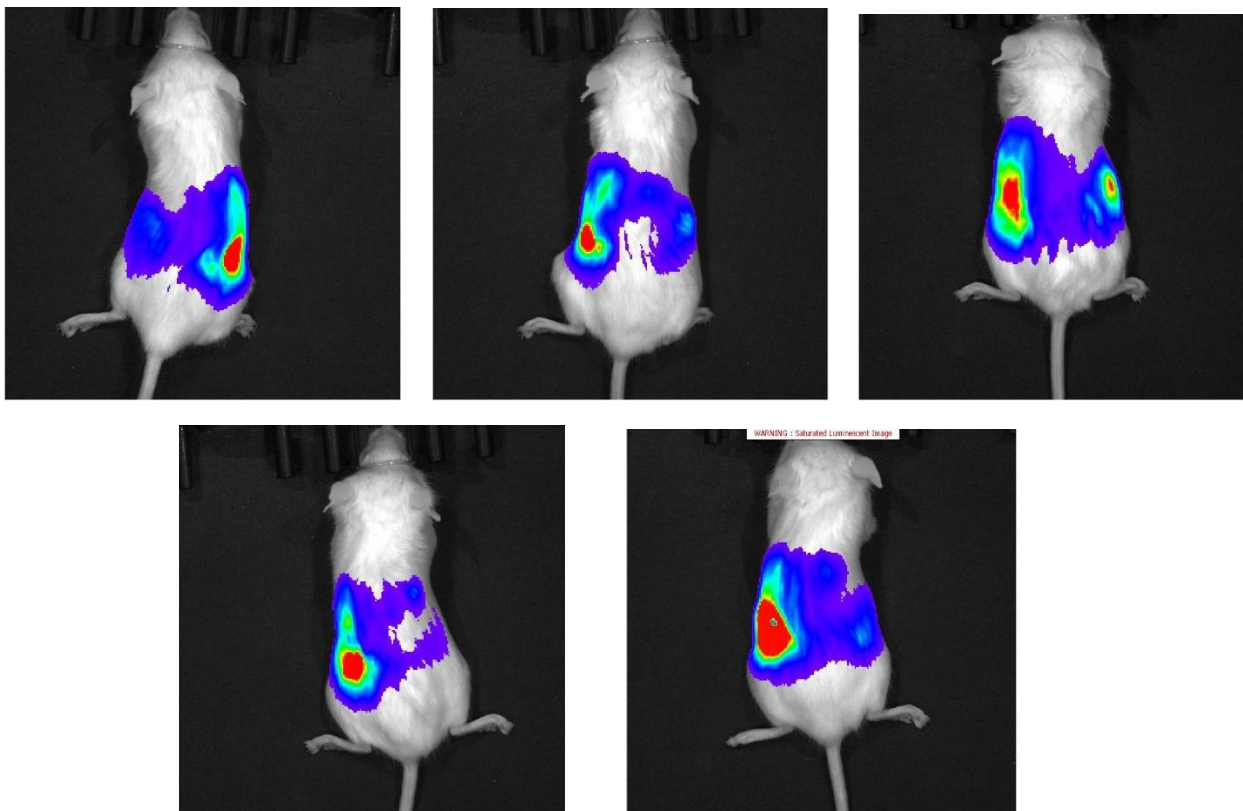

B H&E stained section of primary tumor

Con

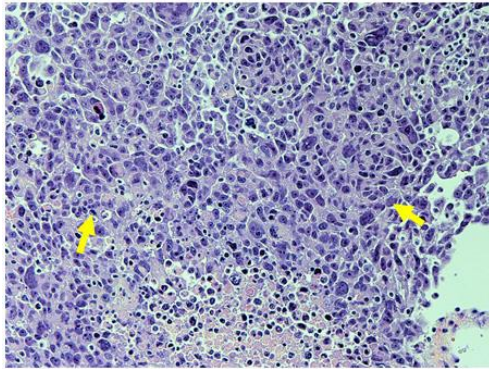

ADSC CM

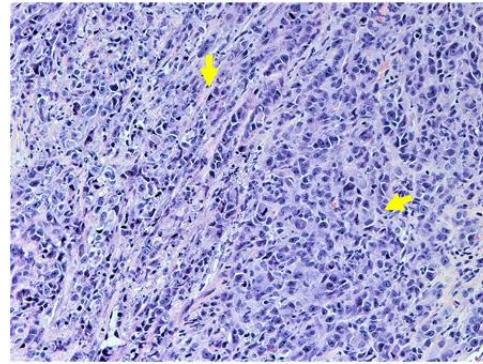

SB

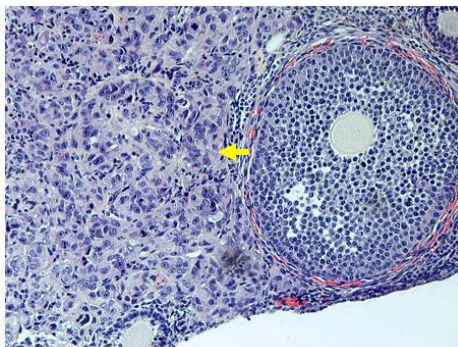

CM+SB

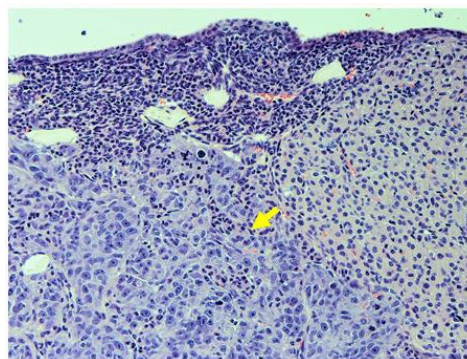

C primary tumors in ovaries by live animal imaging

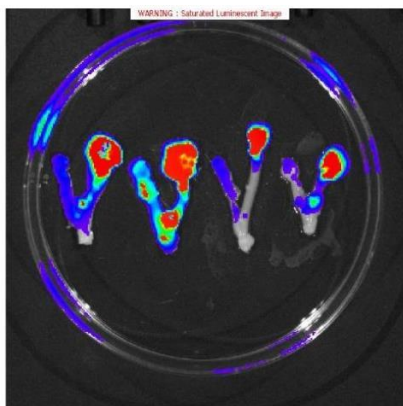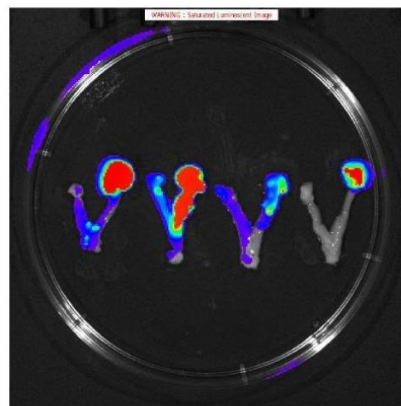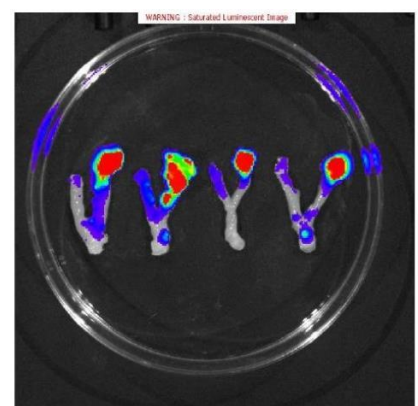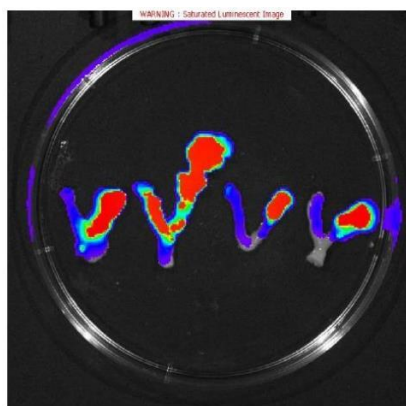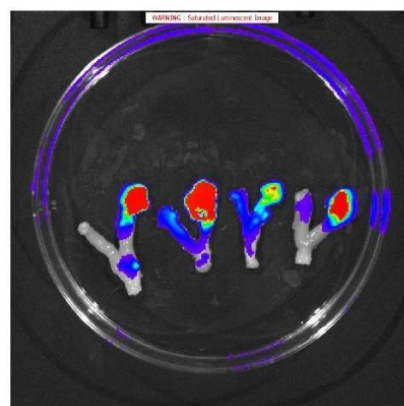

D tumors in ovaries of mice were imaged

Con   ADSC CM   SB   CM+SB

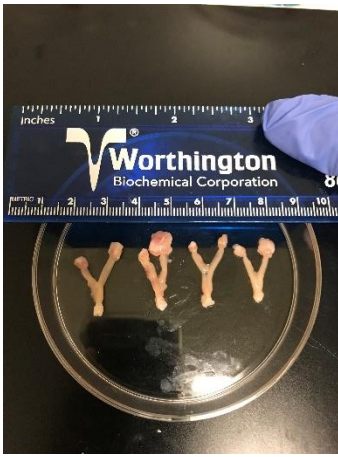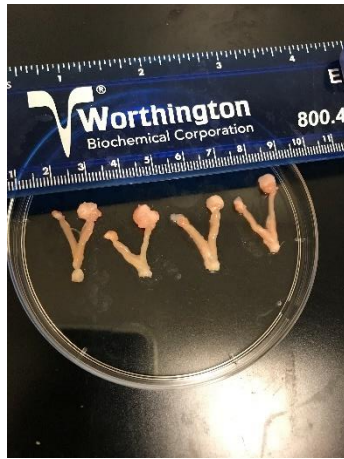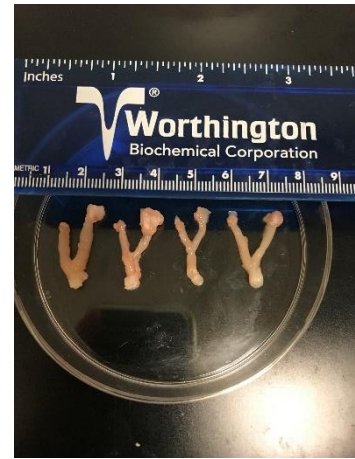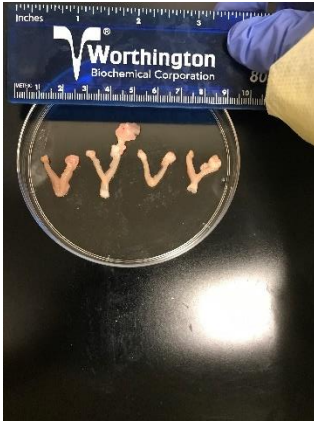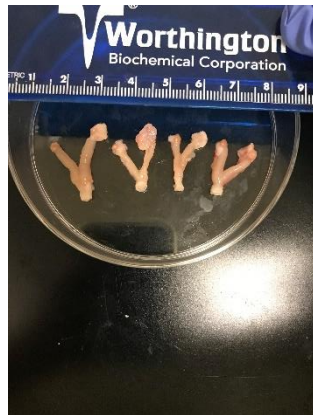

F western blot of p-SMAD2 and EMT markers in primary ovarian tumors

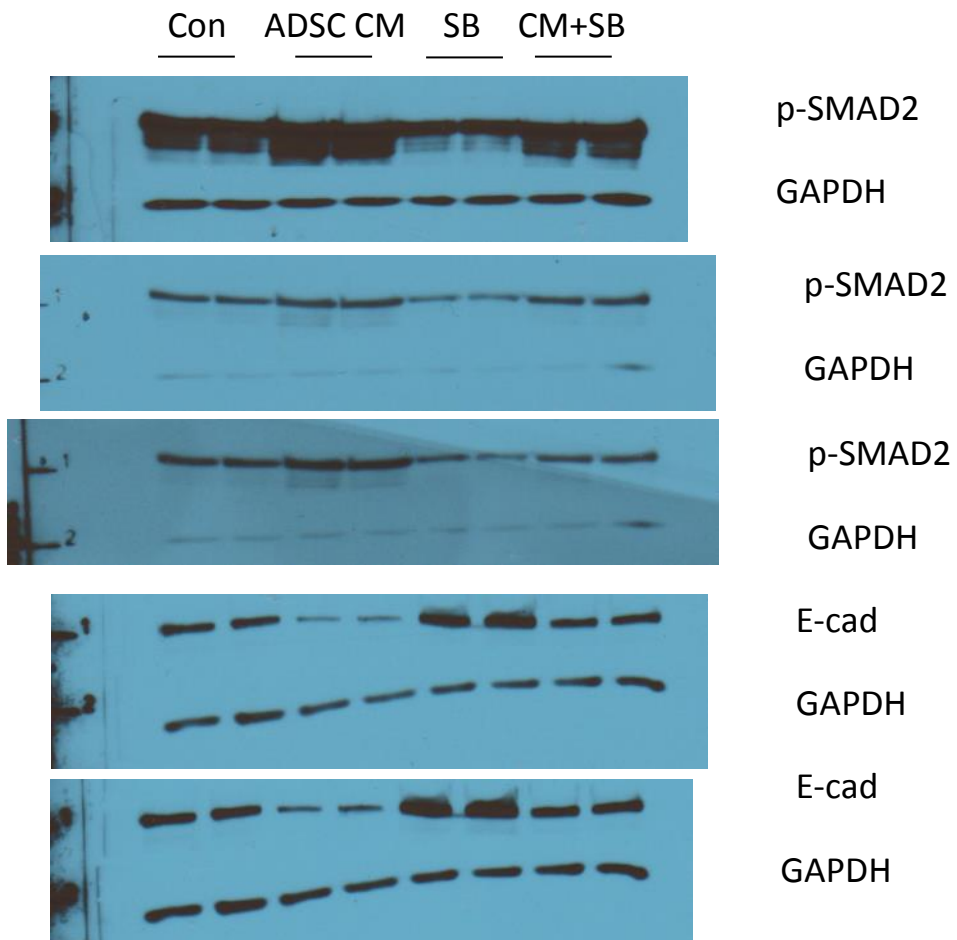

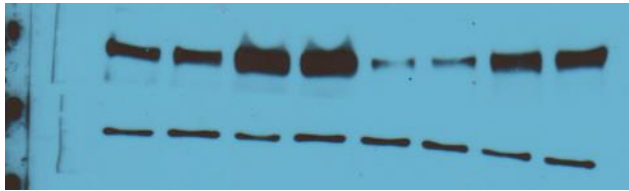

N-cad

GAPDH

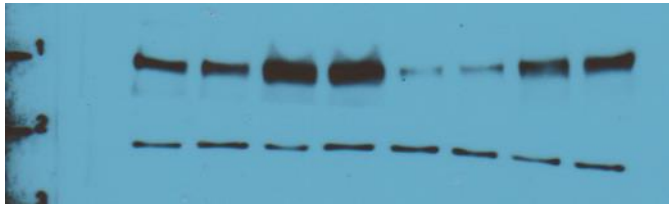

N-cad

GAPDH

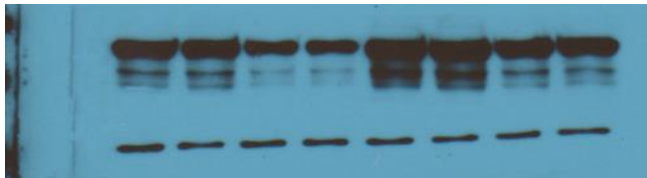

Cyt-7

GAPDH

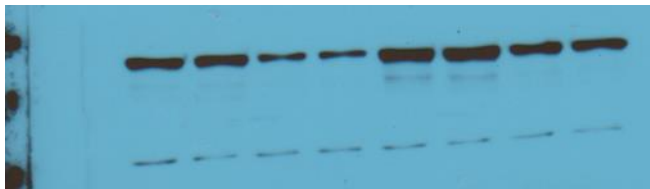

Cyt-7

GAPDH

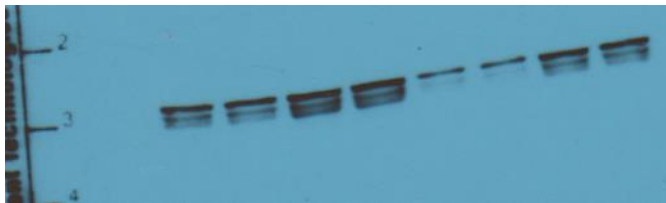

Vimentin

GAPDH

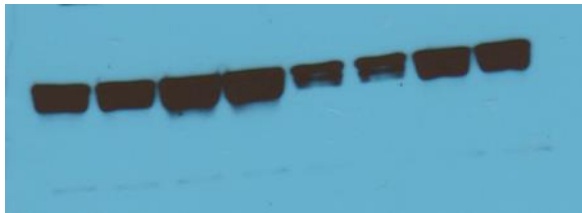

Vimentin

GAPDH

G metastatic tumors of xenografted mice by live animal imaging.

Liver

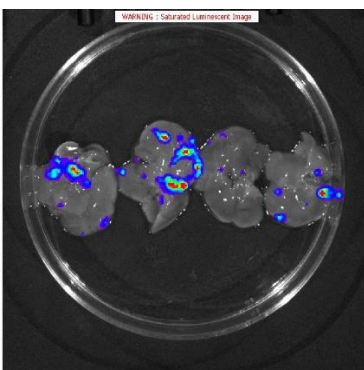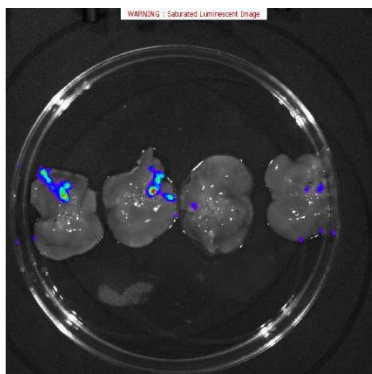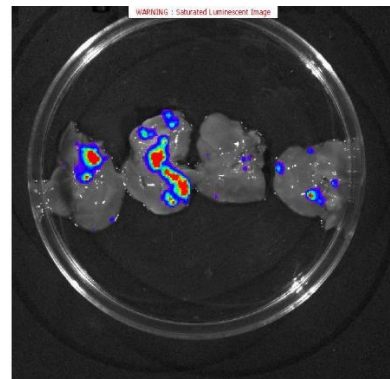

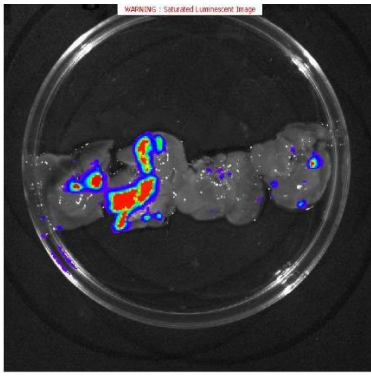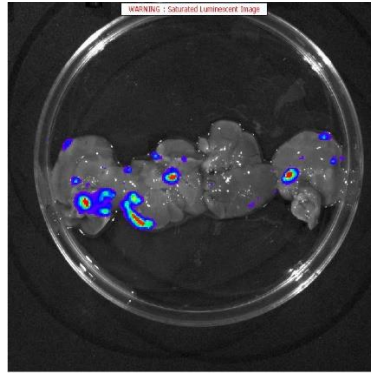

## Spleen

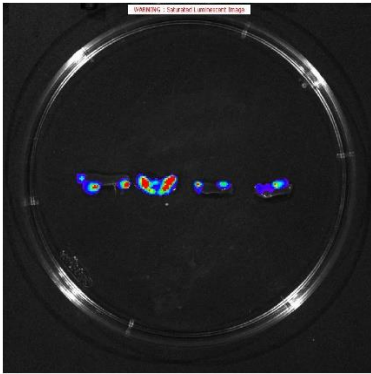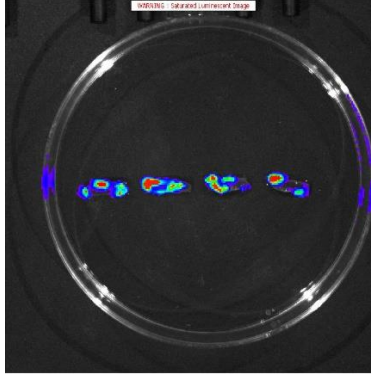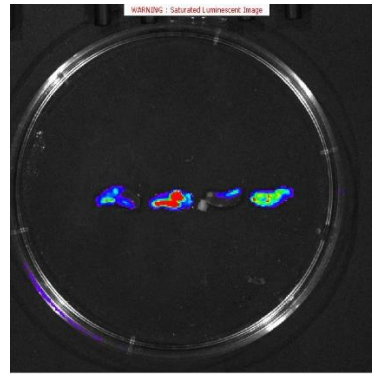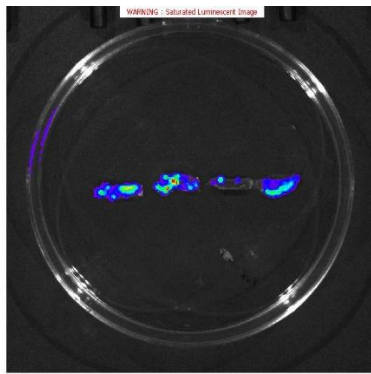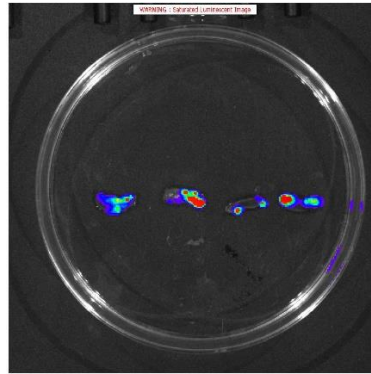

## Kidney

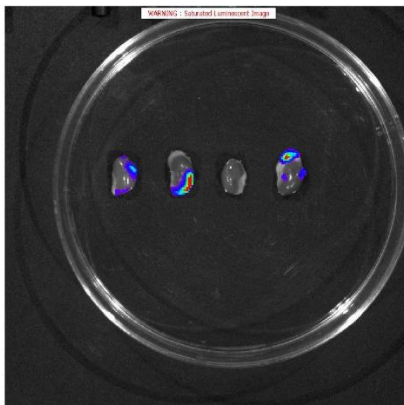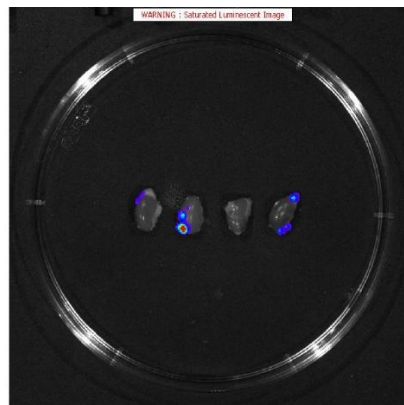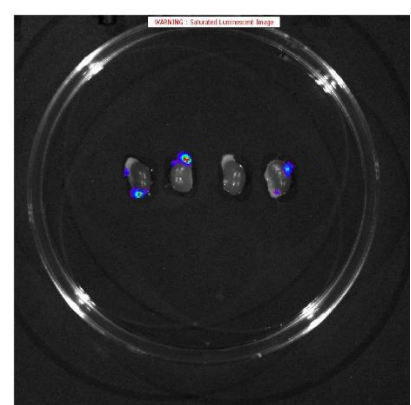

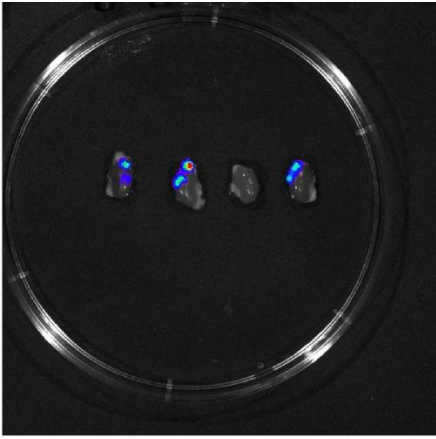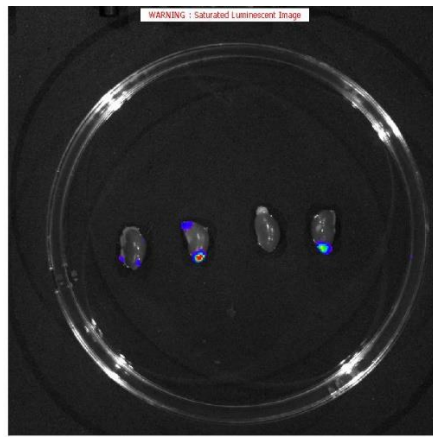

## Intestine

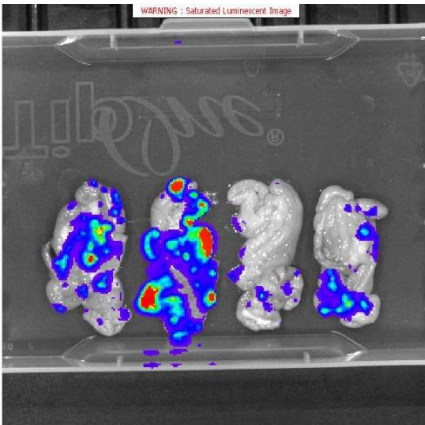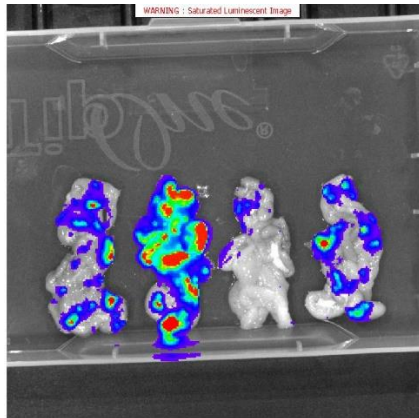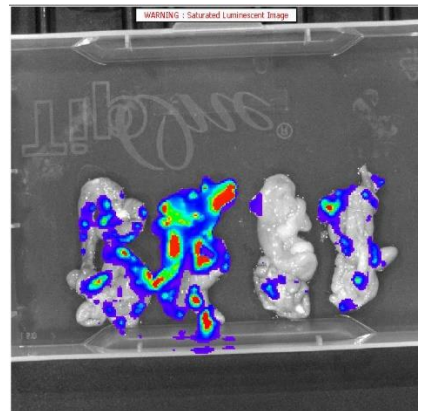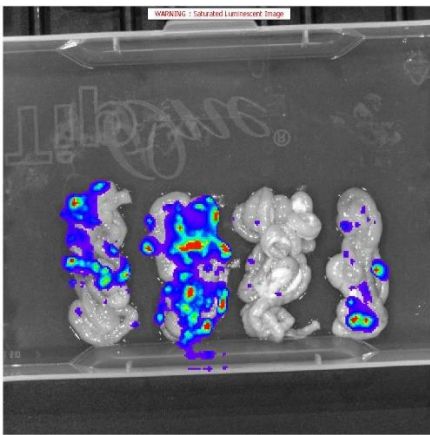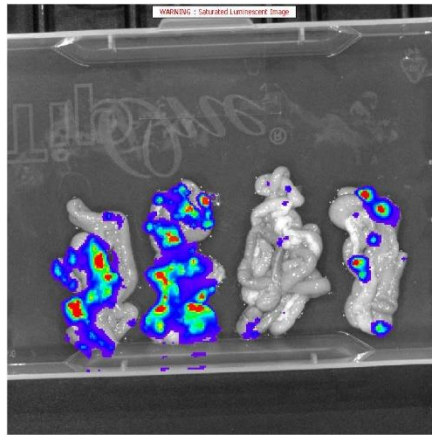

## Stomach

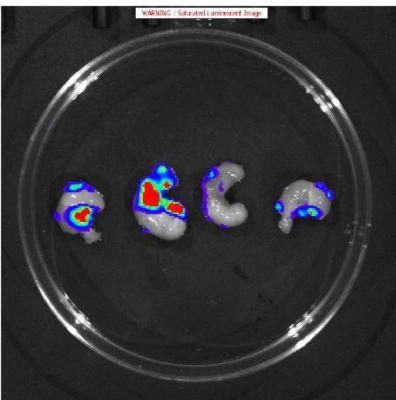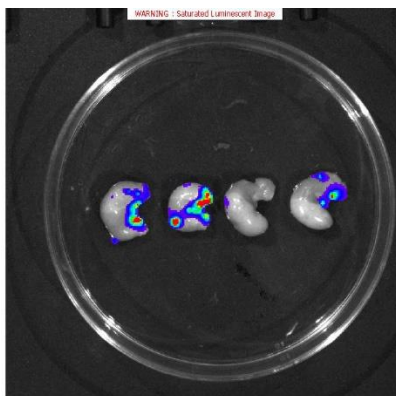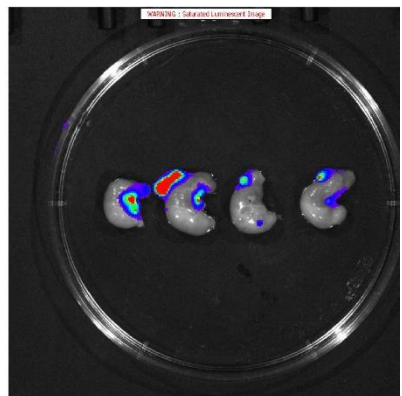

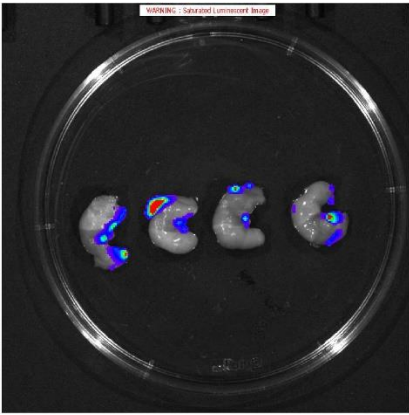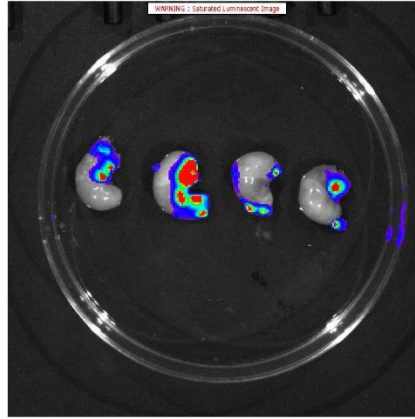

## H Liver H&E staining of metastatic tumors

Con

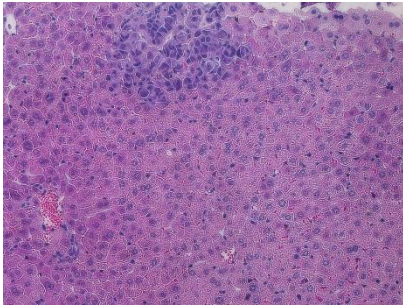

ADSC CM

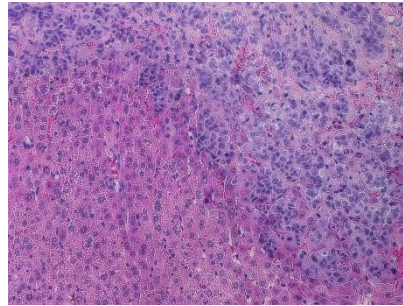

SB

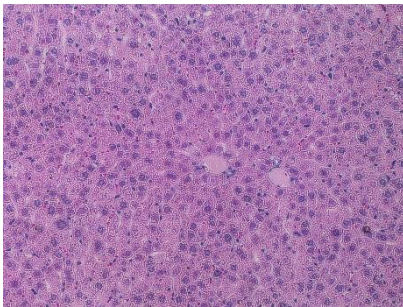

CM+SB

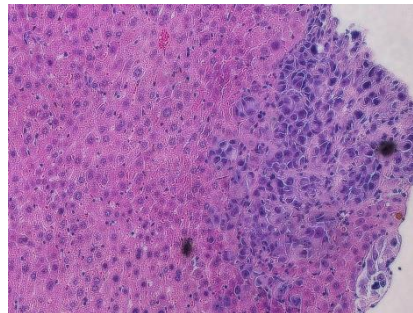

Supplement: DataSheet_2.pdf [file DataSheet_2.pdf]
