# Supplementary material for: Adipose-Derived Stem Cells Facilitate Ovarian Tumor Growth and Metastasis by Promoting Epithelial to Mesenchymal Transition Through Activating the TGF-β Pathway
Source: PubMed Central journal article supplement (PMC8727693; doi:10.3389/fonc.2021.756011), 2021-12-22
Supplement: DataSheet_1.pdf [file DataSheet_1.pdf]

# Supplementary Material

## Supplementary Figure

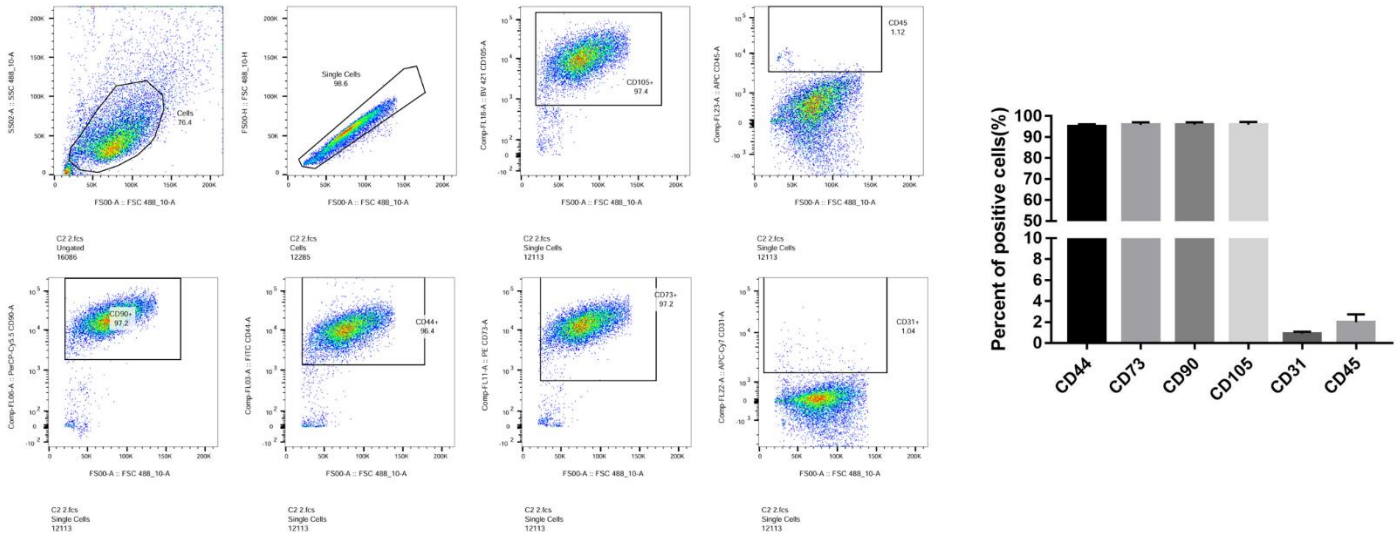

**Supplementary Figure 1.** The surface markers of ADSC were identified by flow cytometry. ADSC were positive for CD44, CD73, CD90, and CD105 and negative for CD31 and CD45.

## OVCAR3

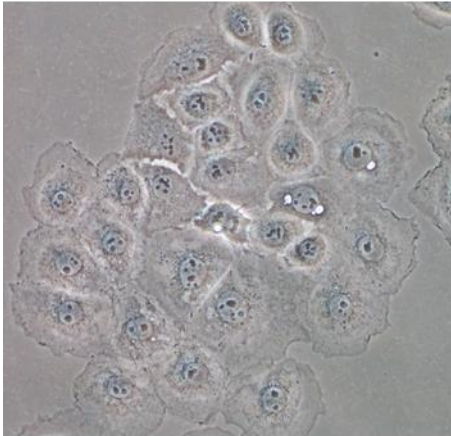

**Con**

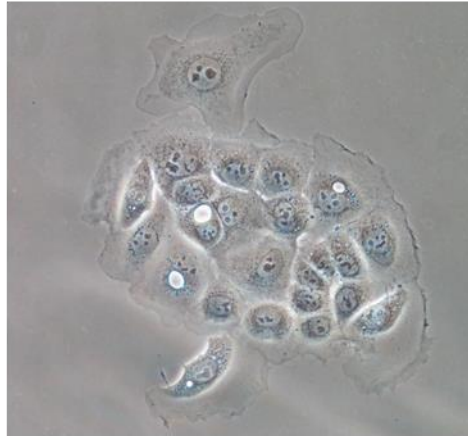

**ADSC CM**

**Supplementary Figure 2.** Morphology of OVCAR3 before and after treatment with ADSC CM.
